# Supplementary material
Source: publisher figshare collection journal article supplement (https://tandf.figshare.com/ndownloader/files/38312261)
Supplement: Supplementary file 1 [file 38312261]

**Supplemental Materials for *Social Comparison, Parasocial Relationships, and Attachment Style: How and When do Celebrities Improve Self-Liking?***

**Scales Included in Studies 1-3:**

**Study 1**

1. Attachment Style scale (Bartholomew & Horowitz, 1991)
2. Ten Item Personality Inventory (TIPI; abbreviated adaptation of the Big 5 scale developed by Gosling et al., 2003).
3. Behavioral inhibition scale (BIS) and Behavioral activation scales (BAS; Carver & White, 1994)
4. Belief in a Just World (modified from Rubin & Peplau, 1975)
5. Rosenberg Self-Esteem Scale (1965)
6. Faith in People Scale (Rosenberg, 1957)
7. Positive and Negative Affect Scale (PANAS; Watson et al, 1988)
8. Desire to Seek Out Celebrities (modified from Derrick et al., 2009)
9. Social Comparison Orientation (Gibbons & Buunk, 1999)
10. Self-Monitoring Scale (Snyder, 1974)
11. Inclusion of Other in the Self Scale (modified from Aron et al., 1992)

**Study 2**

1. Attachment Style scale (Bartholomew & Horowitz, 1991)
2. Rosenberg Self-Esteem Scale (1965)
3. Self-Certainty Scale
4. Adult Attachment Questionnaire (Simpson et al., 1992)
5. Positive and Negative Affect Scale (PANAS; Watson et al, 1988)
6. Relational self-construal (Cross et al., 2000)
7. Inclusion of Other in the Self Scale (modified from Aron et al., 1992)

**Study 3**

1. Attachment Style scale (Bartholomew & Horowitz, 1991)
2. Rosenberg Self-Esteem Scale (1965)
3. Self-Certainty Scale
4. Adult Attachment Questionnaire (Simpson et al., 1992)
5. Positive and Negative Affect Scale (PANAS; Watson et al, 1988)
6. Relational self-construal (Cross et al., 2000)
7. Inclusion of Other in the Self Scale (modified from Aron et al., 1992)
